# Supplementary material for: Adaptation of centromere to breakage through local genomic and epigenomic remodeling in wheat
Source: HighWire-hosted journal article supplement (doi:10.1101/gr.280913.125), 2025-09-30
Supplement: Supplemental_Table_S1.docx [file Supplemental_Table_S1.docx]

**Supplemental Table S1. Locations of the breakpoint-proximal region in wheat CSDt line based on DNA resequencing.**

| **Ditelosomic lines** | **Breakpoint-proximal regions** |
| --- | --- |
| Dt1AS | Chr1A: 212439329-212441328; 213541329-213543328; 215834329-215836328 |
| Dt1AL | Chr1A: 216479329-216481328 |
| Dt1BS | Chr1B: 233122006-233124005; 243979006-243981005; 261798006-261800005 |
| Dt1BL | Chr1B: 233355006-233357005; 234665006-234667005; 235332006-235334005; 238133006-238135005; 261846006-261848005 |
| Dt1DS | Chr1D: 173414937-173416936 |
| Dt1DL | Chr1D: 174330937-174332936 |
| Dt6AS | Chr6A: 288391869-288393868 |
| Dt6AL | Chr6A: 293022869-293024868; 293136869-293138868; 293312869-293314868; 295943869-295945868; 296252869-296254868 |
| Dt6BS | Chr6B: 330336883-330338882; 352057883-352059882; 352636883-352638882 |
| Dt6BL | Chr6B: 330350883-330352882; chr6B: 348786883-348788882; chr6B: 352844883-352846882 |
| Dt6DS | Chr6D: 232844941-232846940; 233351941-233353940; 241450941-241452940 |
| Dt6DL | Chr6D: 243017941-243019940 |
| Dt7AS | Chr7A: 366514460-366516459 |
| Dt7AL | Chr7A: 362001460-362003459; 367118460-367120459; 371156460-371158459 |
| Dt7BS | Chr7A: 317316855-317318854 |
| Dt7BL | Chr7B: 316985855-316987854; 319102855-319104854; 319862855-319864854 |
| Dt7DS | Chr7D: 349730582-349732581 |
| Dt7DL | Chr7D: 350460582-350462581 |
