# Supplementary material for: Adaptation of centromere to breakage through local genomic and epigenomic remodeling in wheat
Source: HighWire-hosted journal article supplement (doi:10.1101/gr.280913.125), 2025-09-30
Supplement: Supplemental_Table_S2.xlsx [file Supplemental_Table_S2.xlsx]

## Sheet: Sheet1
Supplemental_Table_S2. Primers information used in this study.
Primer ID	Forward primer	Reverse primer	Role of primers
1A-P1	GCGGGGTAAGCAAACAAACTC	CCATCTGCTTGGTCTCTGCT	Segment presence or deletion verification
1A-P2	ATCCCCTCCTCCCTCAAGC	TTACCACACCAGCAGAACCA	Segment presence or deletion verification
1A-P3	CCAATGGTGAGCACCAGCTA	AACACCGCATGCCAACTTTC	Segment presence or deletion verification
1A-P4	GATCCAAACAGGCCTCCGAA	GACGCAGCACGCAAAGAAAT	Segment presence or deletion verification
1B-P1	GTCACGCACATTACGAGTGC	CAGGCCTGACAGAGCGTTTA	Segment presence or deletion verification
1B-P2	GGCCATGTACGCCATCATCT	CTGTGTGGCAATGGCTGC	Segment presence or deletion verification
1B-P3	CACCTGCGTAAGTTGCATCG	GTGCAAGTTCAGCCTTGTCG	Segment presence or deletion verification
1B-P4	GTACCACCAGGACTTGCTCC	ATGAAGGAGAGATGCGAGCG	Segment presence or deletion verification
1B-P5	TCTGTAGGCAAGCAACGACA	ACAATAGGTGGTGACCCGTG	Segment presence or deletion verification
1D-P1	CGGGTCTTTGCCGAACTTTG	CGCATATAGGCGCAGGTACA	Segment presence or deletion verification
1D-P2	TCAGGAGGTCTCGATGTCGT	GCAAGCTCCAATACGCGAAG	Segment presence or deletion verification
1D-P3	GGAACGCCCAACACATGAAG	CCCAAAGAGGTGTAGGGTGC	Segment presence or deletion verification
1D-P4	AAGGAGTTCCGCAACAAGGA	ACTGACACGCCTAGCTGATTA	Segment presence or deletion verification
6A-P1	ACAAGTACTCCTCTGCAGGC	TGCCCATCCAGCTCTCTGTA	Segment presence or deletion verification
6A-P2	GTGAGGCTCTATGTCCGTGG	GGATCTGCTTGGATCTGCGT	Segment presence or deletion verification
6A-P3	GGGTTCTCGATAAGAGGCCG	TGGAAGGCCTCTCCTCCTAC	Segment presence or deletion verification
6A-P4	CAAGGCCCCAGATTTTGTCG	ACCATTTGAGGTCGGATCGC	Segment presence or deletion verification
6B-P1	GGAGTGGCTAATGCAAAGGT	TCAGGCAAGTCATCACCTTT	Segment presence or deletion verification
6B-P2	TCCGAAGTTGTAGGTGCCAC	ACAAACAACAAGCCCGAACG	Segment presence or deletion verification
6B-P3	GCGTTGTGTGTGTGGCTAAG	GTCGAACGGTGGTGGAAGAT	Segment presence or deletion verification
6B-P4	CCCCACCCTTGTTTGACCAT	ATCAGCAAGCCAGACGACAA	Segment presence or deletion verification
6D-P1	AGTTTGATTCGGGGCACGAT	TCATAGCAAAGCTCCGGCAA	Segment presence or deletion verification
6D-P2	GCATCTCCTGTCTTGCCCTT	CCAACATGCCTTTTGTGCGA	Segment presence or deletion verification
6D-P3	AGCAATCCAACCAAACGTGC	CCATTGGCACCCATACCTGT	Segment presence or deletion verification
6D-P4	CGTAACTTTTGCCGCGACTG	GCCACTTGCGAAGACAAACT	Segment presence or deletion verification
7A-P1	ACCTCAGGCGGTATGGTTTG	TGTTAACGGTAGTCCAGGCAA	Segment presence or deletion verification
7A-P2	AGAGCTAGGCGTTTTGCCAC	ACCACACCAACAAAATGCCCT	Segment presence or deletion verification
7A-P3	TGACACCAAAGGCTTATTCTCTAC	TGACAGACGCCATAGGAACA	Segment presence or deletion verification
7A-P4	GCGCAAACTGCTCAGTAACCTA	GCTACCATGGCAGGAAGAGA	Segment presence or deletion verification
7B-P1	GCCTCCATTACCCTAGGTGC	AGCACACCTCTGATACCACC	Segment presence or deletion verification
7B-P2	CGGGGCCTTCTTCAATGACT	CAGCCCAGAGTGTTGCTTTTG	Segment presence or deletion verification
7B-P3	GGTTCAGAAAGCCGTCTCCT	AGTGCCAATCGTTTTCGCAG	Segment presence or deletion verification
7B-P4	GGCTAGAGCCCCCTACAGAA	TCCATGGTAATCTGATGCAACCT	Segment presence or deletion verification
7D-P1	ACCTGTTACTTCTGCCCACG	CCCAAAGCCAGTGTCATTGC	Segment presence or deletion verification
7D-P2	GAGCAGGAGATGGGCATGTA	GGTTCGGTTAGGCTCATACC	Segment presence or deletion verification
7D-P3	TCCGGCCGAGAAAAATATGGT	GGACAGGAGAATCTCGTCGT	Segment presence or deletion verification
7D-P4	AGCCTTTCCGTCAGTGTCTT	TGAGGGATGTTTGACGGTCC	Segment presence or deletion verification
RTg211500	CGTGCCCAAGTACGGATACC	GTTGCTCCAGTAGTGGTTCAAATTA	q-PCR
RTg221400	CGGCTAGGGAATGATCTGACC	CTGAGTCACAAGAGCACGGA	q-PCR
RTg224500	CCCAAGAAGGGTTCTGCTGT	TGCAGTCGTCAAATCTTACCTTG	q-PCR
RTg216000	CATGCGCATTGACGGGAAC	GAGCCGATTAGGCACCAGTT	q-PCR
RTg393400	ATGTCAGTTACCGGGGCAG	CCATGGTAATCTGATGCAACACC	q-PCR
RTg267000	ACAAATGCAGCCGATTCAGGT	TCTTTTGAGGACAGCGTGATGA	q-PCR
RTg271200	AATGGCGTTGGTGGTATCAG	TGCACGAATCCAGGCACTA	q-PCR
RTg273700	TCCATGTCAGTTACCGGGGC	TCCATGGTAATCTGATGCAACCT	q-PCR
RTg278100	GACAACGCACCGAAGGAATG	CGTCTGATCCAGAAGACGCA	q-PCR
RTg417700	GGCGAAGAGCAAGATGGTGAG	AGATTTGAGTTGAAGGATCAGCGT	q-PCR
RTg412800	TTACCCCCGTCCGACTATC	AAAGTACCTTACCCTCAATCCCTC	q-PCR
RTg433100	AGGTAACTTAACTTTAGCCAAGGGA	ACGGTATCTGCACCGTTTACT	q-PCR
Actin1	AAGGCTGTTGGCAAGGTG	GTGGTCGTTCAGAGCAATCC	q-PCR
CN1AL_9000	GCCACCTGGCACTTCTATGT	GGAAGGACATGACGCAGACA	Copy number verification
CN1BS_2300	GGCGGACGTCCTTGATGATT	CGATATCCAGAGGCTGGGTG	Copy number verification
CN6AL_6563	CCGCTGCAGGGTAATAGGTT	GGGCTTGGACATCTTGGTGA	Copy number verification
CN7AL_8100	CTTCAGAACTACCCAGCCCG	TTCCTGACCAGAGCAGTCCT	Copy number verification
