# Supplementary material for: Adaptation of centromere to breakage through local genomic and epigenomic remodeling in wheat
Source: HighWire-hosted journal article supplement (doi:10.1101/gr.280913.125), 2025-09-30
Supplement: Supplemental_Table_S3.xlsx [file Supplemental_Table_S3.xlsx]

## Sheet: Sheet1
Supplemental_Table_S3. Identification of differentially gene expression within centromere and pericentromere regions between CS and Dt lines.
Material	Gene	RNA_CS	RNA_Dt	log2(FC)	pvalue	padj	Down or Up	ATAC_CS	ATAC_Dt	CENH3 Binding	Reigon	Centromere structure types
Dt1AS	TraesCSC1A01G179100	70.18	116.353	1.16378	8.25734e-06	0.000118128	Up	13.835	8.117	-	Pericentromere	Maintenance
	TraesCSC1A01G179800	4.51875	2.618	-1.0121	5.95648e-06	8.82684e-05	Down	6.371	4.58	-	Pericentromere	Maintenance
	TraesCSC1A01G180500	2.96275	3.789	1.25993	0.000189351	0.00185855	Up	2.52	2.302	-	Pericentromere	Maintenance
	TraesCSC1A01G180600	3.144	1.267	-1.24411	0.00204675	0.0137926	Down	26.704	18.677	-	Pericentromere	Maintenance
	TraesCSC1A01G186000	7.33775	9.457	1.25033	3.45894e-06	5.3752e-05	Up	70.734	91.832	-	Pericentromere	Maintenance
	TraesCSC1A01G186700	5.42075	2.864	-1.04845	5.45575e-06	8.14024e-05	Down	9.709	11.906	-	Pericentromere	Maintenance
	TraesCSC1A01G187000	1.392	0.506	-1.43705	0.00358849	0.0218482	Down	6.437	8.067	-	Pericentromere	Maintenance
	TraesCSC1A01G188200	4.49225	1.301	-1.79409	1.56755e-08	3.81754e-07	Down	2.523	4.07	-	Pericentromere	Maintenance
	TraesCSC1A01G188300	2.3795	0.728	-1.85457	2.72846e-05	0.000341142	Down	17.53	20.87	-	Pericentromere	Maintenance
Dt1AL	TraesCSC1A01G189000	16.4035	26.118	1.51602	6.34833e-27	8.81723e-25	Up	22.154	127.402	-	Centromere	Maintenance
	TraesCSC1A01G195900	0.88875	1.512	1.25902	0.00429594	0.0238646	Up	5.571	9.817	-	Pericentromere	Maintenance
	TraesCSC1A01G199200	3.77925	2.779	-1.28573	4.05835e-05	0.000439208	Down	27.361	33.266	-	Pericentromere	Maintenance
	TraesCSC1A01G209400	2.3865	4.731	3.08511	1.57073e-28	2.33391e-26	Up	2.43	5.022	-	Pericentromere	Maintenance
	TraesCSC1A01G209600	29.641	19.685	-1.24449	6.18074e-16	3.83957e-14	Down	23.13	23.498	-	Pericentromere	Maintenance
	TraesCSC1A01G211500	20.4303	56.198	2.5955	0.00787121	0.0390823	Up	5.842	15.598	-	Pericentromere	Maintenance
	TraesCSC1A01G211600	1.00425	1.141	1.28069	0.0071923	0.0363196	Up	13.577	39.212	-	Pericentromere	Maintenance
Dt1BS	TraesCSC1B01G220600	5.62725	8.106	1.06255	1.10935e-07	1.57057e-06	Up	9.394	5.464	-	Pericentromere	Neocentromere
	TraesCSC1B01G221400	89.6945	130.976	1.06495	2.13067e-17	1.18702e-15	Up	10.396	10.639	-	Pericentromere	Neocentromere
	TraesCSC1B01G221600	1.245	0.362	-1.56549	0.000522013	0.0035594	Down	41.976	45.531	-	Pericentromere	Neocentromere
	TraesCSC1B01G224500	96.9103	141.809	1.11502	6.53007e-21	5.32302e-19	Up	24.698	11.842	-	Pericentromere	Neocentromere
	TraesCSC1B01G231400	10.6558	14.156	1.11976	1.4035e-12	3.95933e-11	Up	20.439	55.345	-	Centromere	Neocentromere
	TraesCSC1B01G231600	223.305	334.897	1.76744	1.33597e-68	7.16374e-66	Up	39.569	65.538	-	Centromere	Neocentromere
Dt1BL	TraesCSC1B01G255200	6.2735	4.291	-1.05135	1.42452e-07	3.25762e-06	Down	22.833	14.399	-	Pericentromere	Expansion
	TraesCSC1B01G255800	265.04	353	1.11372	1.9667e-15	1.55663e-13	Up	37.782	37.439	-	Pericentromere	Expansion
Dt1DL	TraesCSC1D01G200700	0.49425	0.835	4.20419	7.99134e-05	0.000919908	Up	1.086	2.159	-	Pericentromere	Maintenance
	TraesCSC1D01G204500	3.70825	1.75	-1.23144	3.9187e-10	1.30184e-08	Down	9.074	8.212	-	Pericentromere	Maintenance
	TraesCSC1D01G207300	2.70575	4.082	1.82123	1.88835e-07	4.04522e-06	Up	96.096	128.926	-	Pericentromere	Maintenance
	TraesCSC1D01G209100	3.07	1.559	-1.3655	3.18261e-05	0.000412084	Down	44.901	35.769	-	Pericentromere	Maintenance
	TraesCSC1D01G209200	10.3068	15.733	1.60469	3.58463e-16	2.56295e-14	Up	68.743	74.626	-	Pericentromere	Maintenance
	TraesCSC1D01G210900	2.059	3.139	1.15023	1.99584e-05	0.000272769	Up	33.063	35.041	-	Pericentromere	Maintenance
	TraesCSC1D01G215300	1.288	1.527	1.05086	0.00756001	0.0422833	Up	16.215	19.572	-	Pericentromere	Maintenance
	TraesCSC1D01G216000	1.66725	3.438	3.24674	1.17314e-19	1.2133e-17	Up	11.418	9.909	-	Pericentromere	Maintenance
	TraesCSC1D01G218500	42.382	95.306	2.22955	3.644e-05	0.000463812	Up	9.57	11.063	-	Pericentromere	Maintenance
Dt6AL	TraesCSC6A01G277300	9.23925	18.487	12.0656	1.16591e-16	9.46295e-15	Up	0.227	18.103	-	Pericentromere	Expansion
	TraesCSC6A01G280800	5.033	0	-10.388	2.00309e-12	8.92304e-11	Down	6.324	2.674	-	Pericentromere	Expansion
	TraesCSC6A01G280900	1.33825	2.168	1.54544	8.75594e-06	0.000113524	Up	6.122	8.562	-	Pericentromere	Expansion
Dt6BS	TraesCSC6B01G336300	2.563	1.138	-1.83531	1.14759e-05	0.000380491	Down	31.566	36.176	-	Pericentromere	Neocentromere
	TraesCSC6B01G342600	1.785	1.873	2.69843	0.00057712	0.0133019	Up	5.383	16.697	-	Pericentromere	Neocentromere
Dt6DS	TraesCSC6D01G290400	24.5925	31.375	1.01771	1.16761e-14	6.6685e-13	Up	7.874	26.808	-	Pericentromere	Expansion
	TraesCSC6D01G290600	29.7938	39.98	1.22254	8.86914e-15	5.16444e-13	Up	7.833	29.035	-	Pericentromere	Expansion
Dt6DL	TraesCSC6D01G300200	68.1043	80.294	1.24647	2.43542e-15	1.28206e-13	Up	15.395	10.792	-	Pericentromere	Maintenance
	TraesCSC6D01G309300	15.082	19.051	1.01715	8.36875e-10	1.88245e-08	Up	8.582	7.212	-	Pericentromere	Maintenance
	TraesCSC6D01G309400	211.316	256.772	1.04035	4.70226e-15	2.38723e-13	Up	25.938	18.305	-	Pericentromere	Maintenance
Dt7AL	TraesCSC7A01G388800	20.2135	25.812	1.01315	2.4793e-12	9.27618e-11	Up	14.725	27.062	-	Pericentromere	Expansion
	TraesCSC7A01G393400	91.773	123.742	1.12311	9.21039e-19	7.59549e-17	Up	41.614	48.128	-	Pericentromere	Expansion
	TraesCSC7A01G401600	12.7085	3.139	-2.78029	1.14598e-54	4.62964e-52	Down	7.222	3.337	-	Pericentromere	Expansion
Dt7BS	TraesCSC7B01G267000	0.999	0.275	-2.49475	2.5045e-08	3.2317e-07	Down	14.483	13.348	-	Pericentromere	Maintenance
	TraesCSC7B01G270100	1.72975	0.576	-2.17709	1.5809e-16	6.64295e-15	Down	22.216	14.11	-	Pericentromere	Maintenance
	TraesCSC7B01G271200	9.88475	5.776	-1.05029	8.62515e-17	3.72316e-15	Down	19.527	20.158	-	Pericentromere	Maintenance
	TraesCSC7B01G272700	1.062	0.126	-3.25375	3.28001e-07	3.50583e-06	Down	0	0	-	Pericentromere	Maintenance
Dt7BL	TraesCSC7B01G273700	115.799	144.8	1.03086	4.22554e-20	3.28573e-18	Up	41.593	54.625	-	Centromere	Expansion
	TraesCSC7B01G278100	25.9022	3.604	-3.64069	6.15863e-149	1.46061e-145	Down	11.837	8.086	-	Pericentromere	Expansion
	TraesCSC7B01G280900	9.66925	12.873	1.01559	2.63096e-08	4.21906e-07	Up	12.696	15.401	-	Pericentromere	Expansion
Dt7DS	TraesCSC7D01G405600	0.8035	0.35	-1.27563	0.000349291	0.00356651	Down	3.972	3.998	-	Pericentromere	Maintenance
	TraesCSC7D01G412800	6.995	2.959	-1.29539	1.25116e-07	3.26755e-06	Down	17.771	14.201	-	Pericentromere	Maintenance
	TraesCSC7D01G415500	1.53825	0.631	-1.81377	3.2705e-05	0.00046481	Down	11.026	10.895	-	Pericentromere	Maintenance
	TraesCSC7D01G417700	8.52675	2.661	-1.80455	2.47289e-15	2.58971e-13	Down	4.15	6.772	-	Pericentromere	Maintenance
	TraesCSC7D01G418600	2.3235	0.778	-1.73626	0.00357507	0.0235567	Down	4.215	1.297	-	Centromere	Maintenance
Dt7DL	TraesCSC7D01G426800	2.94975	1.391	-1.89587	0.000324261	0.0020302	Down	2.687	4.13	-	Pericentromere	Maintenance
	TraesCSC7D01G429100	16.4975	0.688	-5.84439	1.08138e-206	5.63101e-203	Down	9.37	4.312	-	Pericentromere	Maintenance
	TraesCSC7D01G433100	0.69125	0.152	-2.66359	2.1739e-12	5.99186e-11	Down	8.45	6.444	-	Pericentromere	Maintenance
	TraesCSC7D01G434900	10.5335	5.768	-1.00153	2.7557e-06	2.85192e-05	Down	6.763	8.287	-	Pericentromere	Maintenance
	TraesCSC7D01G440400	5.335	8.813	2.38433	2.42555e-17	1.26792e-15	Up	2.707	9.665	-	Pericentromere	Maintenance
