# Supplementary material for: Adaptation of centromere to breakage through local genomic and epigenomic remodeling in wheat
Source: HighWire-hosted journal article supplement (doi:10.1101/gr.280913.125), 2025-09-30
Supplement: Supplemental_Table_S4.xlsx [file Supplemental_Table_S4.xlsx]

## Sheet: Sheet1
Supplemental_Table_S4. Identification of differentially accessible chromatin regions (DARs) within (peri)centromeres between CS and Dt lines.
Material	Chr	Start	End	Length	log2(FC)	pvalue	padj	Down or Up	Reigon	Variant types
Dt1AL	Chr1A	216845351	216846239	888	4.39789	1.09e-05	0.000491906	Up	Centromere	Maintenance
	Chr1A	217479663	217480086	423	3.72871	0.000192464	0.00505739	Up	Centromere	Maintenance
	Chr1A	217722036	217723157	1121	19.3768	1.21e-83	1.17e-78	Up	Centromere	Maintenance
	Chr1A	217725912	217726444	532	11.4875	1.52e-30	1.05e-26	Up	Centromere	Maintenance
	Chr1A	217739236	217741225	1989	20.3912	2e-92	3.85e-87	Up	Centromere	Maintenance
	Chr1A	217753616	217754423	807	15.6924	1.7e-55	5.47e-51	Up	Centromere	Maintenance
	Chr1A	219869229	219869896	667	5.90526	3.52e-09	6.09e-07	Up	Pericentromere	Maintenance
	Chr1A	221602469	221603026	557	6.52336	6.87e-11	2.33e-08	Up	Pericentromere	Maintenance
	Chr1A	222742316	222742828	512	4.15939	3.19e-05	0.00118255	Up	Pericentromere	Maintenance
	Chr1A	222754952	222755552	600	6.36219	1.99e-10	5.7e-08	Up	Pericentromere	Maintenance
	Chr1A	223463687	223464042	355	-3.51428	0.000440948	0.00972601	Down	Pericentromere	Maintenance
	Chr1A	225026205	225027605	1400	6.2122	5.22e-10	1.27e-07	Up	Pericentromere	Maintenance
	Chr1A	225048531	225048925	394	3.77906	0.00015742	0.00431986	Up	Pericentromere	Maintenance
	Chr1A	227189579	227190289	710	-6.25597	3.95e-10	1.01e-07	Down	Pericentromere	Maintenance
	Chr1A	228987493	228987990	497	5.40518	6.47e-08	6.83e-06	Up	Pericentromere	Maintenance
	Chr1A	230568546	230569549	1003	3.69393	0.000220817	0.005652	Up	Pericentromere	Maintenance
	Chr1A	231392403	231393415	1012	4.24909	2.15e-05	0.000856247	Up	Pericentromere	Maintenance
	Chr1A	232466943	232468054	1111	4.51019	6.48e-06	0.000317673	Up	Pericentromere	Maintenance
	Chr1A	235476447	235477254	807	-3.98899	6.64e-05	0.00213885	Down	Pericentromere	Maintenance
	Chr1A	236784810	236785593	783	5.41089	6.27e-08	6.66e-06	Up	Pericentromere	Maintenance
	Chr1A	237496101	237497065	964	5.9068	3.49e-09	6.04e-07	Up	Pericentromere	Maintenance
	Chr1A	238052552	238053120	568	3.57084	0.000355837	0.00822315	Up	Pericentromere	Maintenance
	Chr1A	241320629	241321455	826	5.57578	2.46e-08	3.08e-06	Up	Pericentromere	Maintenance
	Chr1A	241856032	241856637	605	4.30782	1.65e-05	0.000690294	Up	Pericentromere	Maintenance
	Chr1A	243672150	243672427	277	3.84411	0.00012099	0.003484	Up	Pericentromere	Maintenance
	Chr1A	246788016	246788936	920	3.68979	0.000224437	0.00572184	Up	Pericentromere	Maintenance
	Chr1A	249395785	249396134	349	-3.99533	6.46e-05	0.00209466	Down	Pericentromere	Maintenance
	Chr1A	252671032	252671571	539	5.51265	3.53e-08	4.14e-06	Up	Pericentromere	Maintenance
	Chr1A	253012673	253013302	629	3.82969	0.000128304	0.00365959	Up	Pericentromere	Maintenance
	Chr1A	256497132	256497886	754	3.88041	0.000104281	0.00308261	Up	Pericentromere	Maintenance
	Chr1A	257464834	257465548	714	4.19125	2.77e-05	0.00105386	Up	Pericentromere	Maintenance
	Chr1A	258825420	258826327	907	-5.20808	1.91e-07	1.69e-05	Down	Pericentromere	Maintenance
	Chr1A	258830629	258831592	963	-6.17061	6.8e-10	1.57e-07	Down	Pericentromere	Maintenance
	Chr1A	260003439	260003846	407	4.46952	7.84e-06	0.000370993	Up	Pericentromere	Maintenance
	Chr1A	260246635	260247164	529	5.6482	1.62e-08	2.19e-06	Up	Pericentromere	Maintenance
	Chr1A	260693656	260694015	359	4.83796	1.31e-06	8.52e-05	Up	Pericentromere	Maintenance
	Chr1A	265227864	265228204	340	4.0112	6.04e-05	0.00198439	Up	Pericentromere	Maintenance
	Chr1A	267478162	267478797	635	8.22019	2.03e-16	2.74e-13	Up	Pericentromere	Maintenance
	Chr1A	267646821	267648177	1356	8.73172	2.51e-18	4.19e-15	Up	Pericentromere	Maintenance
	Chr1A	235601877	235602421	544	10.1653	2.83e-24	9.33e-21	Up	Pericentromere	Maintenance
Dt1AS	Chr1A	170885271	170885500	229	-4.00004	6.33e-05	0.00133461	Down	Pericentromere	Maintenance
	Chr1A	178228346	178229578	1232	-3.62837	0.000285211	0.00452899	Down	Pericentromere	Maintenance
	Chr1A	188279388	188279991	603	4.72542	2.3e-06	9.06e-05	Up	Pericentromere	Maintenance
	Chr1A	193509893	193510543	650	4.21187	2.53e-05	0.000635574	Up	Pericentromere	Maintenance
	Chr1A	204486561	204486971	410	3.47516	0.000510557	0.00719519	Up	Pericentromere	Maintenance
	Chr1A	208564867	208565892	1025	5.9172	3.27e-09	3.88e-07	Up	Pericentromere	Maintenance
	Chr1A	208567084	208567590	506	3.90647	9.37e-05	0.00183259	Up	Pericentromere	Maintenance
	Chr1A	210581739	210582597	858	6.89685	5.32e-12	1.35e-09	Up	Pericentromere	Maintenance
	Chr1A	211267466	211267969	503	4.08944	4.32e-05	0.000976757	Up	Pericentromere	Maintenance
	Chr1A	211272948	211273756	808	8.61869	6.77e-18	4.59e-15	Up	Pericentromere	Maintenance
	Chr1A	211710931	211711775	844	4.35618	1.32e-05	0.000377805	Up	Pericentromere	Maintenance
Dt1BL	Chr1B	237908391	237908964	573	3.58425	0.000338054	0.0087241	Up	Centromere	Expansion
	Chr1B	263093619	263093958	339	3.58457	0.000337631	0.00871486	Up	Pericentromere	Expansion
	Chr1B	280431335	280432989	1654	-4.87377	1.09e-06	7.12e-05	Down	Pericentromere	Expansion
	Chr1B	281288747	281289394	647	8.52574	1.52e-17	2.26e-14	Up	Pericentromere	Expansion
	Chr1B	284584339	284584958	619	5.12318	3e-07	2.37e-05	Up	Pericentromere	Expansion
	Chr1B	287284200	287285072	872	-4.48498	7.29e-06	0.000355621	Down	Pericentromere	Expansion
	Chr1B	296197155	296198204	1049	-4.28327	1.84e-05	0.000779088	Down	Pericentromere	Expansion
Dt1BS	Chr1B	244584412	244585402	990	10.5079	7.94e-26	5.03e-23	Up	Centromere	Neocentromere
	Chr1B	244986260	244987100	840	9.34324	9.34e-21	4.1e-18	Up	Centromere	Neocentromere
	Chr1B	244993048	244993233	185	5.92305	3.16e-09	2.59e-07	Up	Centromere	Neocentromere
	Chr1B	244994435	244994891	456	7.62203	2.5e-14	5.37e-12	Up	Centromere	Neocentromere
	Chr1B	244996287	244997271	984	6.08179	1.19e-09	1.08e-07	Up	Centromere	Neocentromere
	Chr1B	183280383	183280805	422	4.72246	2.33e-06	7.48e-05	Up	Pericentromere	Neocentromere
	Chr1B	184990371	184991594	1223	4.95434	7.26e-07	2.81e-05	Up	Pericentromere	Neocentromere
	Chr1B	184996284	184997175	891	4.3282	1.5e-05	0.000351891	Up	Pericentromere	Neocentromere
	Chr1B	185124219	185124456	237	3.73354	0.000188805	0.00281625	Up	Pericentromere	Neocentromere
	Chr1B	185125727	185126158	431	4.85909	1.18e-06	4.24e-05	Up	Pericentromere	Neocentromere
	Chr1B	190801110	190802012	902	6.26222	3.8e-10	3.88e-08	Up	Pericentromere	Neocentromere
	Chr1B	190885016	190885789	773	6.72383	1.77e-11	2.44e-09	Up	Pericentromere	Neocentromere
	Chr1B	191385843	191386557	714	4.16508	3.11e-05	0.000640798	Up	Pericentromere	Neocentromere
	Chr1B	192117390	192117640	250	3.6856	0.000228161	0.0032815	Up	Pericentromere	Neocentromere
	Chr1B	199268802	199270147	1345	-3.49736	0.000469883	0.00589928	Down	Pericentromere	Neocentromere
	Chr1B	200263813	200264539	726	4.74989	2.04e-06	6.68e-05	Up	Pericentromere	Neocentromere
	Chr1B	200271436	200271789	353	6.2503	4.1e-10	4.15e-08	Up	Pericentromere	Neocentromere
	Chr1B	200275266	200276296	1030	5.00205	5.67e-07	2.28e-05	Up	Pericentromere	Neocentromere
	Chr1B	201173501	201173774	273	3.79177	0.000149578	0.00233062	Up	Pericentromere	Neocentromere
	Chr1B	201643614	201644390	776	-4.20571	2.6e-05	0.00055309	Down	Pericentromere	Neocentromere
	Chr1B	203984876	203985571	695	3.50158	0.000462504	0.00582279	Up	Pericentromere	Neocentromere
	Chr1B	207111025	207112178	1153	-4.66802	3.04e-06	9.3e-05	Down	Pericentromere	Neocentromere
	Chr1B	208385221	208386061	840	3.56913	0.000358171	0.00473638	Up	Pericentromere	Neocentromere
	Chr1B	209678015	209678804	789	6.59157	4.35e-11	5.59e-09	Up	Pericentromere	Neocentromere
	Chr1B	210675443	210675965	522	3.85765	0.000114483	0.00186593	Up	Pericentromere	Neocentromere
	Chr1B	210676047	210676536	489	4.48554	7.27e-06	0.000194035	Up	Pericentromere	Neocentromere
	Chr1B	211307251	211307813	562	6.41882	1.37e-10	1.56e-08	Up	Pericentromere	Neocentromere
	Chr1B	216678935	216679506	571	3.32297	0.000890643	0.00988004	Up	Pericentromere	Neocentromere
	Chr1B	221963735	221964806	1071	4.05551	5e-05	0.000943862	Up	Pericentromere	Neocentromere
	Chr1B	225937817	225938944	1127	11.3115	1.15e-29	9.52e-27	Up	Pericentromere	Neocentromere
	Chr1B	225941692	225942111	419	9.16519	4.95e-20	2.03e-17	Up	Pericentromere	Neocentromere
	Chr1B	225943756	225944421	665	3.7568	0.000172101	0.00261114	Up	Pericentromere	Neocentromere
	Chr1B	230231911	230232985	1074	5.65706	1.54e-08	1.05e-06	Up	Pericentromere	Neocentromere
	Chr1B	230606983	230607594	611	4.27228	1.93e-05	0.000434076	Up	Pericentromere	Neocentromere
	Chr1B	231563382	231563858	476	4.76356	1.9e-06	6.32e-05	Up	Pericentromere	Neocentromere
	Chr1B	233086532	233087745	1213	7.3023	2.83e-13	5.18e-11	Up	Pericentromere	Neocentromere
	Chr1B	209436376	209437559	1183	3.44183	0.000577795	0.00696829	Up	Pericentromere	Neocentromere
	Chr1B	213007605	213009149	1544	-3.87658	0.000105933	0.00174922	Down	Pericentromere	Neocentromere
	Chr1B	221969727	221970506	779	-4.16022	3.18e-05	0.000651555	Down	Pericentromere	Neocentromere
	Chr1B	247149607	247149986	379	3.9471	7.91e-05	0.00137515	Up	Pericentromere	Neocentromere
	Chr1B	247564750	247565008	258	3.39442	0.000687729	0.00802725	Up	Pericentromere	Neocentromere
	Chr1B	247769107	247769420	313	4.194	2.74e-05	0.000577104	Up	Pericentromere	Neocentromere
	Chr1B	248177633	248178269	636	4.12505	3.71e-05	0.000738933	Up	Pericentromere	Neocentromere
	Chr1B	248178673	248179107	434	8.34097	7.37e-17	2.16e-14	Up	Pericentromere	Neocentromere
	Chr1B	251438653	251439283	630	5.72317	1.05e-08	7.45e-07	Up	Pericentromere	Neocentromere
	Chr1B	251473848	251474703	855	8.76811	1.82e-18	6.43e-16	Up	Pericentromere	Neocentromere
	Chr1B	252375190	252376126	936	4.2629	2.02e-05	0.000448804	Up	Pericentromere	Neocentromere
	Chr1B	253119145	253120604	1459	7.81696	5.41e-15	1.27e-12	Up	Pericentromere	Neocentromere
	Chr1B	256220281	256221997	1716	6.27956	3.4e-10	3.52e-08	Up	Pericentromere	Neocentromere
	Chr1B	256765456	256765764	308	3.5293	0.000416662	0.00536178	Up	Pericentromere	Neocentromere
	Chr1B	256876060	256877125	1065	8.80112	1.35e-18	4.84e-16	Up	Pericentromere	Neocentromere
	Chr1B	257125020	257125962	942	5.32188	1.03e-07	5.39e-06	Up	Pericentromere	Neocentromere
	Chr1B	260356678	260357622	944	10.3224	5.58e-25	3.39e-22	Up	Pericentromere	Neocentromere
	Chr1B	260638941	260640115	1174	7.33534	2.21e-13	4.1e-11	Up	Pericentromere	Neocentromere
Dt1DL	Chr1D	185896424	185896885	461	4.72312	2.32e-06	0.000186404	Up	Pericentromere	Maintenance
	Chr1D	186805381	186806310	929	4.00193	6.28e-05	0.0029787	Up	Pericentromere	Maintenance
	Chr1D	188329862	188330487	625	7.838	4.58e-15	4.36e-12	Up	Pericentromere	Maintenance
	Chr1D	188330743	188331281	538	3.93336	8.38e-05	0.00378403	Up	Pericentromere	Maintenance
	Chr1D	188350804	188351089	285	3.84843	0.000118878	0.00508643	Up	Pericentromere	Maintenance
	Chr1D	199614438	199614842	404	4.89406	9.88e-07	9.05e-05	Up	Pericentromere	Maintenance
	Chr1D	202081461	202081951	490	3.99151	6.57e-05	0.00309145	Up	Pericentromere	Maintenance
	Chr1D	203897781	203898345	564	9.20749	3.34e-20	6.57e-17	Up	Pericentromere	Maintenance
	Chr1D	205183866	205184300	434	5.64805	1.62e-08	2.87e-06	Up	Pericentromere	Maintenance
	Chr1D	205494990	205496063	1073	7.98841	1.37e-15	1.43e-12	Up	Pericentromere	Maintenance
	Chr1D	205706776	205707437	661	7.92425	2.3e-15	2.31e-12	Up	Pericentromere	Maintenance
	Chr1D	208493885	208494577	692	4.4704	7.81e-06	0.000520804	Up	Pericentromere	Maintenance
	Chr1D	215078711	215079745	1034	7.26548	3.72e-13	2.52e-10	Up	Pericentromere	Maintenance
	Chr1D	224220996	224221902	906	6.14335	8.08e-10	2.25e-07	Up	Pericentromere	Maintenance
Dt6AL	Chr6A	301715285	301715604	319	4.33452	1.46e-05	0.000351269	Up	Pericentromere	Expansion
	Chr6A	303056581	303057579	998	-4.20121	2.65e-05	0.00058129	Down	Pericentromere	Expansion
	Chr6A	304640934	304641348	414	4.9443	7.64e-07	2.88e-05	Up	Pericentromere	Expansion
	Chr6A	304813621	304814033	412	6.3137	2.72e-10	2.84e-08	Up	Pericentromere	Expansion
	Chr6A	304814761	304815098	337	5.57122	2.53e-08	1.54e-06	Up	Pericentromere	Expansion
	Chr6A	305166819	305167952	1133	3.38384	0.000714805	0.00860945	Up	Pericentromere	Expansion
	Chr6A	306530117	306530363	246	4.48664	7.24e-06	0.000194869	Up	Pericentromere	Expansion
	Chr6A	307397774	307398275	501	5.32658	1e-07	5.01e-06	Up	Pericentromere	Expansion
	Chr6A	307403166	307403452	286	3.60304	0.000314522	0.00447659	Up	Pericentromere	Expansion
	Chr6A	308480569	308481117	548	6.76936	1.29e-11	1.86e-09	Up	Pericentromere	Expansion
	Chr6A	308661508	308661862	354	5.89244	3.81e-09	2.94e-07	Up	Pericentromere	Expansion
	Chr6A	308708147	308709205	1058	-5.02266	5.1e-07	2.02e-05	Down	Pericentromere	Expansion
	Chr6A	308814159	308815341	1182	9.24366	2.38e-20	1.21e-17	Up	Pericentromere	Expansion
	Chr6A	309216169	309216828	659	-4.73912	2.15e-06	6.96e-05	Down	Pericentromere	Expansion
	Chr6A	309232528	309233749	1221	-5.41157	6.25e-08	3.36e-06	Down	Pericentromere	Expansion
	Chr6A	310579700	310580288	588	9.05559	1.36e-19	6.24e-17	Up	Pericentromere	Expansion
	Chr6A	311293743	311293986	243	5.34136	9.23e-08	4.68e-06	Up	Pericentromere	Expansion
	Chr6A	311296386	311296628	242	5.32301	1.02e-07	5.09e-06	Up	Pericentromere	Expansion
	Chr6A	311296874	311297225	351	7.59114	3.17e-14	7.46e-12	Up	Pericentromere	Expansion
	Chr6A	311316683	311317527	844	5.89429	3.76e-09	2.91e-07	Up	Pericentromere	Expansion
	Chr6A	311488065	311489150	1085	-10.5751	3.89e-26	3.37e-23	Down	Pericentromere	Expansion
	Chr6A	311802963	311803711	748	-5.0906	3.57e-07	1.49e-05	Down	Pericentromere	Expansion
	Chr6A	315213163	315213668	505	5.90859	3.45e-09	2.7e-07	Up	Pericentromere	Expansion
	Chr6A	317121751	317122395	644	-4.18107	2.9e-05	0.000626504	Down	Pericentromere	Expansion
	Chr6A	317122846	317123212	366	-4.97892	6.39e-07	2.47e-05	Down	Pericentromere	Expansion
	Chr6A	317946052	317946449	397	-3.99897	6.36e-05	0.00120514	Down	Pericentromere	Expansion
	Chr6A	318429867	318430314	447	4.81357	1.48e-06	5.07e-05	Up	Pericentromere	Expansion
	Chr6A	318617247	318617639	392	5.4488	5.07e-08	2.8e-06	Up	Pericentromere	Expansion
	Chr6A	319584451	319585318	867	7.48117	7.37e-14	1.61e-11	Up	Pericentromere	Expansion
	Chr6A	320155401	320156322	921	11.7284	9.11e-32	1.14e-28	Up	Pericentromere	Expansion
	Chr6A	320723165	320723730	565	5.2529	1.5e-07	7.08e-06	Up	Pericentromere	Expansion
	Chr6A	320727524	320728126	602	6.26479	3.73e-10	3.71e-08	Up	Pericentromere	Expansion
	Chr6A	322924737	322925160	423	-5.25245	1.5e-07	7.1e-06	Down	Pericentromere	Expansion
	Chr6A	323560083	323560416	333	4.25846	2.06e-05	0.000468536	Up	Pericentromere	Expansion
	Chr6A	323561458	323561723	265	4.54816	5.41e-06	0.000152008	Up	Pericentromere	Expansion
	Chr6A	323676274	323676607	333	4.97642	6.48e-07	2.49e-05	Up	Pericentromere	Expansion
	Chr6A	324606244	324607152	908	-4.27586	1.9e-05	0.000439252	Down	Pericentromere	Expansion
	Chr6A	325573841	325574984	1143	3.53575	0.000406618	0.00549573	Up	Pericentromere	Expansion
	Chr6A	326074518	326075092	574	5.43814	5.38e-08	2.95e-06	Up	Pericentromere	Expansion
	Chr6A	326681218	326681845	627	5.26256	1.42e-07	6.78e-06	Up	Pericentromere	Expansion
	Chr6A	327461848	327462290	442	5.20291	1.96e-07	8.92e-06	Up	Pericentromere	Expansion
	Chr6A	327462509	327462955	446	5.43559	5.46e-08	2.99e-06	Up	Pericentromere	Expansion
	Chr6A	327783452	327784947	1495	9.20582	3.39e-20	1.7e-17	Up	Pericentromere	Expansion
	Chr6A	328226383	328226813	430	3.44382	0.000573561	0.00723168	Up	Pericentromere	Expansion
	Chr6A	328233617	328234134	517	4.99203	5.97e-07	2.33e-05	Up	Pericentromere	Expansion
	Chr6A	328283635	328284002	367	5.87331	4.27e-09	3.26e-07	Up	Pericentromere	Expansion
	Chr6A	329504267	329504726	459	-4.37621	1.21e-05	0.00029832	Down	Pericentromere	Expansion
	Chr6A	329504772	329505272	500	-5.89137	3.83e-09	2.96e-07	Down	Pericentromere	Expansion
	Chr6A	330810904	330811377	473	3.40647	0.000658091	0.0080582	Up	Pericentromere	Expansion
	Chr6A	330811760	330812038	278	3.74919	0.00017741	0.00280677	Up	Pericentromere	Expansion
	Chr6A	331114669	331115011	342	4.36453	1.27e-05	0.000312039	Up	Pericentromere	Expansion
	Chr6A	331550001	331550613	612	7.03372	2.01e-12	3.45e-10	Up	Pericentromere	Expansion
	Chr6A	331940978	331941625	647	3.56378	0.000365557	0.00504537	Up	Pericentromere	Expansion
	Chr6A	334252188	334252832	644	6.9905	2.74e-12	4.55e-10	Up	Pericentromere	Expansion
	Chr6A	335952021	335952289	268	4.08149	4.47e-05	0.000899382	Up	Pericentromere	Expansion
	Chr6A	335952911	335953568	657	6.72903	1.71e-11	2.37e-09	Up	Pericentromere	Expansion
	Chr6A	336743280	336744351	1071	-5.71242	1.11e-08	7.51e-07	Down	Pericentromere	Expansion
	Chr6A	336837672	336838062	390	5.04519	4.53e-07	1.83e-05	Up	Pericentromere	Expansion
	Chr6A	338392656	338394007	1351	-6.24139	4.34e-10	4.23e-08	Down	Pericentromere	Expansion
	Chr6A	339583084	339584132	1048	6.03814	1.56e-09	1.33e-07	Up	Pericentromere	Expansion
	Chr6A	340933426	340934063	637	-4.1229	3.74e-05	0.000774463	Down	Pericentromere	Expansion
	Chr6A	341040273	341040757	484	-4.11413	3.89e-05	0.000799212	Down	Pericentromere	Expansion
	Chr6A	344681240	344682656	1416	-7.32964	2.31e-13	4.63e-11	Down	Pericentromere	Expansion
	Chr6A	347274683	347275006	323	4.86713	1.13e-06	4.04e-05	Up	Pericentromere	Expansion
	Chr6A	347301748	347302614	866	-3.98962	6.62e-05	0.00124391	Down	Pericentromere	Expansion
	Chr6A	310573959	310575265	1306	17.3164	3.54e-67	3.43e-63	Up	Pericentromere	Expansion
	Chr6A	326335967	326336677	710	-6.18664	6.15e-10	5.79e-08	Down	Pericentromere	Expansion
	Chr6A	340934415	340935174	759	-3.81	0.000138969	0.00229199	Down	Pericentromere	Expansion
	Chr6A	311294829	311296070	1241	20.0725	1.28e-89	3.42e-85	Up	Pericentromere	Expansion
	Chr6A	329514586	329515222	636	11.2308	2.88e-29	3.07e-26	Up	Pericentromere	Expansion
	Chr6A	346553863	346554972	1109	6.96394	3.31e-12	5.43e-10	Up	Pericentromere	Expansion
Dt6AS	Chr6A	249171022	249171556	534	6.3935	1.62e-10	8.62e-09	Up	Pericentromere	Maintenance
	Chr6A	252695603	252696771	1168	-4.35488	1.33e-05	0.000189486	Down	Pericentromere	Maintenance
	Chr6A	259140574	259140922	348	3.35622	0.000790157	0.00626673	Up	Pericentromere	Maintenance
	Chr6A	260687163	260688146	983	3.8737	0.000107197	0.00115515	Up	Pericentromere	Maintenance
	Chr6A	260828558	260828820	262	5.87234	4.3e-09	1.63e-07	Up	Pericentromere	Maintenance
	Chr6A	260836638	260836931	293	6.16749	6.94e-10	3.2e-08	Up	Pericentromere	Maintenance
	Chr6A	260837082	260837455	373	3.37115	0.000748553	0.00598811	Up	Pericentromere	Maintenance
	Chr6A	262697778	262698650	872	3.72446	0.000195731	0.00192779	Up	Pericentromere	Maintenance
	Chr6A	262973727	262974447	720	-4.04153	5.31e-05	0.000629978	Down	Pericentromere	Maintenance
	Chr6A	266007853	266008469	616	-4.1264	3.68e-05	0.000459722	Down	Pericentromere	Maintenance
	Chr6A	269686379	269687796	1417	6.27661	3.46e-10	1.71e-08	Up	Pericentromere	Maintenance
	Chr6A	270170889	270171910	1021	4.00572	6.18e-05	0.000718729	Up	Pericentromere	Maintenance
	Chr6A	271055202	271055671	469	7.1371	9.53e-13	8.08e-11	Up	Pericentromere	Maintenance
	Chr6A	271259313	271259631	318	4.47268	7.72e-06	0.000117938	Up	Pericentromere	Maintenance
	Chr6A	274797363	274797911	548	3.20523	0.00134955	0.00978578	Up	Pericentromere	Maintenance
	Chr6A	274798217	274798718	501	4.63236	3.62e-06	6.08e-05	Up	Pericentromere	Maintenance
	Chr6A	282231736	282232395	659	-4.61048	4.02e-06	6.65e-05	Down	Pericentromere	Maintenance
	Chr6A	283405250	283405570	320	3.6102	0.000305955	0.00282049	Up	Pericentromere	Maintenance
	Chr6A	283405925	283406222	297	3.93091	8.46e-05	0.000942117	Up	Pericentromere	Maintenance
	Chr6A	284175452	284176815	1363	5.60405	2.09e-08	6.62e-07	Up	Pericentromere	Maintenance
Dt6BL	Chr6B	332784565	332785144	579	7.06829	1.57e-12	3.91e-10	Up	Pericentromere	Contraction
	Chr6B	330923747	330925313	1566	8.04852	8.38e-16	5.85e-13	Up	Pericentromere	Contraction
	Chr6B	355779442	355779943	501	3.4235	0.000618205	0.00824706	Up	Pericentromere	Contraction
	Chr6B	367326416	367326709	293	4.10688	4.01e-05	0.000824787	Up	Pericentromere	Contraction
	Chr6B	372836749	372837482	733	3.41942	0.000627556	0.00834524	Up	Pericentromere	Contraction
	Chr6B	378058751	378059734	983	4.66442	3.09e-06	9.09e-05	Up	Pericentromere	Contraction
	Chr6B	378197467	378197888	421	4.81385	1.48e-06	4.82e-05	Up	Pericentromere	Contraction
	Chr6B	382110338	382111319	981	4.99386	5.92e-07	2.18e-05	Up	Pericentromere	Contraction
	Chr6B	390736918	390737774	856	10.7535	5.71e-27	1.2e-23	Up	Pericentromere	Contraction
	Chr6B	398186004	398186376	372	4.21345	2.52e-05	0.000552034	Up	Pericentromere	Contraction
	Chr6B	398505464	398505849	385	4.35059	1.36e-05	0.000325674	Up	Pericentromere	Contraction
Dt6BS	Chr6B	322402143	322402775	632	5.65302	1.58e-08	6.85e-07	Up	Centromere	Neocentromere
	Chr6B	283050633	283051426	793	-7.98089	1.45e-15	7.26e-13	Down	Pericentromere	Neocentromere
	Chr6B	283268141	283268671	530	-3.57975	0.000343917	0.00371377	Down	Pericentromere	Neocentromere
	Chr6B	283269278	283269670	392	-3.25308	0.00114161	0.00999129	Down	Pericentromere	Neocentromere
	Chr6B	285467594	285468438	844	-6.3808	1.76e-10	1.48e-08	Down	Pericentromere	Neocentromere
	Chr6B	285468481	285469819	1338	-12.7601	2.74e-37	2.64e-33	Down	Pericentromere	Neocentromere
	Chr6B	286548501	286549126	625	3.54552	0.000391842	0.00414369	Up	Pericentromere	Neocentromere
	Chr6B	289418649	289419804	1155	-4.25786	2.06e-05	0.000341887	Down	Pericentromere	Neocentromere
	Chr6B	296666771	296667747	976	-6.83798	8.03e-12	1.1e-09	Down	Pericentromere	Neocentromere
	Chr6B	296676515	296676899	384	-3.26015	0.00111351	0.00978665	Down	Pericentromere	Neocentromere
	Chr6B	301426798	301427445	647	-3.52536	0.000422903	0.00441911	Down	Pericentromere	Neocentromere
	Chr6B	303601164	303602839	1675	-6.24487	4.24e-10	3.09e-08	Down	Pericentromere	Neocentromere
	Chr6B	303613270	303614031	761	4.13202	3.6e-05	0.000548131	Up	Pericentromere	Neocentromere
	Chr6B	304496774	304498237	1463	-4.89042	1.01e-06	2.51e-05	Down	Pericentromere	Neocentromere
	Chr6B	305673762	305674562	800	4.90243	9.47e-07	2.38e-05	Up	Pericentromere	Neocentromere
	Chr6B	306799308	306800083	775	-4.92844	8.29e-07	2.12e-05	Down	Pericentromere	Neocentromere
	Chr6B	306821514	306821911	397	3.28587	0.00101667	0.00908784	Up	Pericentromere	Neocentromere
	Chr6B	307154066	307154468	402	5.13999	2.75e-07	8.11e-06	Up	Pericentromere	Neocentromere
	Chr6B	314671998	314672553	555	-3.73308	0.000189154	0.00225407	Down	Pericentromere	Neocentromere
	Chr6B	315927468	315928845	1377	6.40134	1.54e-10	1.32e-08	Up	Pericentromere	Neocentromere
	Chr6B	316265450	316265917	467	3.81003	0.000138951	0.00174043	Up	Pericentromere	Neocentromere
	Chr6B	317063686	317064605	919	5.62887	1.81e-08	7.75e-07	Up	Pericentromere	Neocentromere
	Chr6B	325580957	325581351	394	-3.59818	0.000320447	0.00349799	Down	Pericentromere	Neocentromere
	Chr6B	328241229	328241655	426	-5.97123	2.35e-09	1.34e-07	Down	Pericentromere	Neocentromere
	Chr6B	328574463	328575473	1010	-7.49403	6.68e-14	1.99e-11	Down	Pericentromere	Neocentromere
Dt6DL	Chr6D	251896198	251897017	819	3.4809	0.000499739	0.00678253	Up	Pericentromere	Maintenance
	Chr6D	252800090	252800525	435	7.27817	3.38e-13	1.2e-10	Up	Pericentromere	Maintenance
	Chr6D	254243101	254243673	572	4.09979	4.14e-05	0.000885671	Up	Pericentromere	Maintenance
	Chr6D	256386542	256387097	555	-3.45162	0.000557237	0.00740866	Down	Pericentromere	Maintenance
	Chr6D	257723572	257724068	496	5.30924	1.1e-07	6.41e-06	Up	Pericentromere	Maintenance
	Chr6D	261463838	261465273	1435	-4.49363	7e-06	0.000204156	Down	Pericentromere	Maintenance
	Chr6D	266853463	266854502	1039	-3.79794	0.000145902	0.00249389	Down	Pericentromere	Maintenance
	Chr6D	271567118	271567780	662	5.67932	1.35e-08	1.11e-06	Up	Pericentromere	Maintenance
	Chr6D	272922746	272923217	471	3.38838	0.000703069	0.0088771	Up	Pericentromere	Maintenance
	Chr6D	273003699	273004471	772	6.49999	8.03e-11	1.5e-08	Up	Pericentromere	Maintenance
	Chr6D	273373803	273374201	398	4.80078	1.58e-06	5.91e-05	Up	Pericentromere	Maintenance
	Chr6D	276912084	276912555	471	4.53958	5.64e-06	0.00017065	Up	Pericentromere	Maintenance
	Chr6D	276941811	276942466	655	4.08972	4.32e-05	0.000918296	Up	Pericentromere	Maintenance
	Chr6D	278575297	278576090	793	5.804	6.48e-09	6.03e-07	Up	Pericentromere	Maintenance
	Chr6D	289774819	289775233	414	4.38757	1.15e-05	0.000306868	Up	Pericentromere	Maintenance
	Chr6D	289775546	289776414	868	5.55478	2.78e-08	2.02e-06	Up	Pericentromere	Maintenance
	Chr6D	290082682	290083034	352	3.98533	6.74e-05	0.0013239	Up	Pericentromere	Maintenance
	Chr6D	290747252	290748046	794	6.91479	4.69e-12	1.25e-09	Up	Pericentromere	Maintenance
	Chr6D	291500938	291501300	362	4.59813	4.26e-06	0.000134759	Up	Pericentromere	Maintenance
	Chr6D	291518392	291518645	253	3.43331	0.000596266	0.00779766	Up	Pericentromere	Maintenance
	Chr6D	293382785	293383241	456	3.59575	0.00032346	0.00476898	Up	Pericentromere	Maintenance
	Chr6D	254868989	254869680	691	3.84945	0.000118384	0.00210819	Up	Pericentromere	Maintenance
Dt6DS	Chr6D	189410004	189410532	528	-4.18619	2.84e-05	0.000639646	Down	Pericentromere	Expansion
	Chr6D	191003140	191003672	532	-4.71418	2.43e-06	7.77e-05	Down	Pericentromere	Expansion
	Chr6D	193967433	193968296	863	-3.57941	0.000344377	0.0052117	Down	Pericentromere	Expansion
	Chr6D	205226187	205226901	714	-4.39442	1.11e-05	0.000287619	Down	Pericentromere	Expansion
	Chr6D	208493923	208494487	564	5.45671	4.85e-08	2.62e-06	Up	Pericentromere	Expansion
	Chr6D	210465345	210465603	258	-3.91761	8.94e-05	0.00168803	Down	Pericentromere	Expansion
	Chr6D	214079422	214080231	809	4.94213	7.73e-07	2.87e-05	Up	Pericentromere	Expansion
	Chr6D	214260201	214261434	1233	4.66843	3.04e-06	9.42e-05	Up	Pericentromere	Expansion
	Chr6D	214262290	214262925	635	6.10672	1.02e-09	9.7e-08	Up	Pericentromere	Expansion
	Chr6D	216475951	216476677	726	5.93835	2.88e-09	2.34e-07	Up	Pericentromere	Expansion
	Chr6D	226467112	226468223	1111	-5.09031	3.57e-07	1.47e-05	Down	Pericentromere	Expansion
	Chr6D	229444173	229444910	737	3.49033	0.000482424	0.00690178	Up	Pericentromere	Expansion
	Chr6D	233485487	233486118	631	6.10354	1.04e-09	9.83e-08	Up	Pericentromere	Expansion
	Chr6D	233519566	233520230	664	4.20918	2.56e-05	0.000588022	Up	Pericentromere	Expansion
	Chr6D	233563083	233564060	977	10.7784	4.36e-27	9.79e-24	Up	Pericentromere	Expansion
	Chr6D	234014117	234015076	959	5.24891	1.53e-07	7.06e-06	Up	Pericentromere	Expansion
	Chr6D	234141546	234142295	749	4.43215	9.33e-06	0.000247661	Up	Pericentromere	Expansion
	Chr6D	234951869	234952226	357	3.51981	0.000431849	0.0062936	Up	Pericentromere	Expansion
	Chr6D	235181641	235182337	696	7.7631	8.29e-15	4.15e-12	Up	Pericentromere	Expansion
	Chr6D	235187357	235187922	565	5.23783	1.62e-07	7.43e-06	Up	Pericentromere	Expansion
	Chr6D	214335203	214335829	626	4.1817	2.89e-05	0.000651255	Up	Pericentromere	Expansion
	Chr6D	233504632	233505346	714	6.21374	5.17e-10	5.47e-08	Up	Pericentromere	Expansion
Dt7AL	Chr7A	373604661	373605208	547	3.79204	0.000149414	0.00180493	Up	Centromere	Expansion
	Chr7A	362140121	362140545	424	4.43104	9.38e-06	0.000166829	Up	Pericentromere	Expansion
	Chr7A	362408261	362409145	884	6.6078	3.9e-11	3.75e-09	Up	Pericentromere	Expansion
	Chr7A	362585498	362587010	1512	20.0472	2.13e-89	1.95e-84	Up	Pericentromere	Expansion
	Chr7A	365390695	365391533	838	5.90368	3.55e-09	1.88e-07	Up	Pericentromere	Expansion
	Chr7A	366422742	366423507	765	4.74797	2.05e-06	4.5e-05	Up	Pericentromere	Expansion
	Chr7A	366652750	366653469	719	7.02458	2.15e-12	2.98e-10	Up	Pericentromere	Expansion
	Chr7A	374665919	374666814	895	9.21225	3.19e-20	2.42e-17	Up	Pericentromere	Expansion
	Chr7A	374991317	374992262	945	4.07615	4.58e-05	0.00065423	Up	Pericentromere	Expansion
	Chr7A	375053766	375054632	866	3.79622	0.000146919	0.00177925	Up	Pericentromere	Expansion
	Chr7A	376707148	376707815	667	-4.19314	2.75e-05	0.000422628	Down	Pericentromere	Expansion
	Chr7A	376841929	376842553	624	3.25601	0.0011299	0.00994711	Up	Pericentromere	Expansion
	Chr7A	378098235	378098754	519	8.00618	1.18e-15	3.82e-13	Up	Pericentromere	Expansion
	Chr7A	378098959	378099374	415	3.97554	7.02e-05	0.000946462	Up	Pericentromere	Expansion
	Chr7A	385978163	385978760	597	-4.90413	9.38e-07	2.28e-05	Down	Pericentromere	Expansion
	Chr7A	387699920	387700514	594	3.4591	0.000541982	0.00539995	Up	Pericentromere	Expansion
	Chr7A	387704395	387704721	326	4.00876	6.1e-05	0.000837872	Up	Pericentromere	Expansion
	Chr7A	387779990	387780485	495	4.68943	2.74e-06	5.77e-05	Up	Pericentromere	Expansion
	Chr7A	390097344	390097916	572	4.26252	2.02e-05	0.00032315	Up	Pericentromere	Expansion
	Chr7A	390359258	390360001	743	-4.92285	8.53e-07	2.1e-05	Down	Pericentromere	Expansion
	Chr7A	390678047	390679188	1141	11.0451	2.32e-28	6.13e-25	Up	Pericentromere	Expansion
	Chr7A	391920243	391921236	993	-7.02311	2.17e-12	3e-10	Down	Pericentromere	Expansion
	Chr7A	392881357	392881946	589	3.29054	0.000999949	0.00898469	Up	Pericentromere	Expansion
	Chr7A	407202908	407203824	916	6.8195	9.14e-12	1.06e-09	Up	Pericentromere	Expansion
	Chr7A	415040994	415041588	594	3.50848	0.000450682	0.00462685	Up	Pericentromere	Expansion
	Chr7A	415213187	415213882	695	6.72521	1.75e-11	1.87e-09	Up	Pericentromere	Expansion
	Chr7A	420889204	420889908	704	-4.2885	1.8e-05	0.000292417	Down	Pericentromere	Expansion
Dt7AS	Chr7A	362140121	362140517	396	3.66411	0.000248202	0.00639933	Up	Centromere	Neocentromere
	Chr7A	363580670	363581517	847	5.74898	8.98e-09	1.71e-06	Up	Centromere	Neocentromere
	Chr7A	363606111	363607368	1257	6.91739	4.6e-12	2.99e-09	Up	Centromere	Neocentromere
	Chr7A	364266056	364266730	674	4.99839	5.78e-07	4.86e-05	Up	Centromere	Neocentromere
	Chr7A	364863755	364864869	1114	7.24065	4.47e-13	3.83e-10	Up	Centromere	Neocentromere
	Chr7A	365394408	365395096	688	5.27204	1.35e-07	1.51e-05	Up	Centromere	Neocentromere
	Chr7A	330888830	330889277	447	5.53304	3.15e-08	4.76e-06	Up	Pericentromere	Neocentromere
	Chr7A	334867449	334867865	416	5.02319	5.08e-07	4.38e-05	Up	Pericentromere	Neocentromere
	Chr7A	346975446	346975821	375	4.37486	1.22e-05	0.000568736	Up	Pericentromere	Neocentromere
	Chr7A	347124358	347124794	436	4.07881	4.53e-05	0.00163846	Up	Pericentromere	Neocentromere
	Chr7A	348181912	348183205	1293	6.75853	1.39e-11	7.96e-09	Up	Pericentromere	Neocentromere
	Chr7A	359683819	359684803	984	-5.67992	1.35e-08	2.39e-06	Down	Pericentromere	Neocentromere
	Chr7A	359691087	359692015	928	-6.20485	5.48e-10	1.86e-07	Down	Pericentromere	Neocentromere
	Chr7A	359799425	359799772	347	-3.73073	0.000190926	0.00518256	Down	Pericentromere	Neocentromere
	Chr7A	359857538	359857955	417	-4.78012	1.75e-06	0.000118417	Down	Pericentromere	Neocentromere
	Chr7A	360121455	360121862	407	-4.00051	6.32e-05	0.0021444	Down	Pericentromere	Neocentromere
	Chr7A	360125369	360125606	237	-4.0507	5.11e-05	0.00179998	Down	Pericentromere	Neocentromere
	Chr7A	360557302	360557741	439	4.5532	5.28e-06	0.000287428	Up	Pericentromere	Neocentromere
	Chr7A	360630224	360630702	478	6.91526	4.67e-12	3.02e-09	Up	Pericentromere	Neocentromere
Dt7BL	Chr7B	320474558	320474894	336	4.91184	9.02e-07	2.95e-05	Up	Centromere	Expansion
	Chr7B	324041170	324041591	421	4.81853	1.45e-06	4.42e-05	Up	Pericentromere	Expansion
	Chr7B	327625955	327626921	966	4.51938	6.2e-06	0.000151854	Up	Pericentromere	Expansion
	Chr7B	327786688	327787201	513	5.0739	3.9e-07	1.44e-05	Up	Pericentromere	Expansion
	Chr7B	333407671	333408162	491	4.23372	2.3e-05	0.000455535	Up	Pericentromere	Expansion
	Chr7B	335189261	335189901	640	4.10177	4.1e-05	0.000739238	Up	Pericentromere	Expansion
	Chr7B	335192410	335193171	761	3.91209	9.15e-05	0.00144699	Up	Pericentromere	Expansion
	Chr7B	336808818	336809159	341	3.51391	0.000441557	0.00527759	Up	Pericentromere	Expansion
	Chr7B	336813422	336814571	1149	4.6684	3.04e-06	8.28e-05	Up	Pericentromere	Expansion
	Chr7B	336814953	336815355	402	4.78152	1.74e-06	5.17e-05	Up	Pericentromere	Expansion
	Chr7B	338136451	338136878	427	5.14419	2.69e-07	1.05e-05	Up	Pericentromere	Expansion
	Chr7B	338163797	338164658	861	4.66743	3.05e-06	8.32e-05	Up	Pericentromere	Expansion
	Chr7B	341554479	341555079	600	8.54066	1.33e-17	7.46e-15	Up	Pericentromere	Expansion
	Chr7B	341556244	341557115	871	9.32658	1.09e-20	9.43e-18	Up	Pericentromere	Expansion
	Chr7B	341792553	341793027	474	5.45724	4.84e-08	2.42e-06	Up	Pericentromere	Expansion
	Chr7B	349627638	349629100	1462	-5.09935	3.41e-07	1.28e-05	Down	Pericentromere	Expansion
	Chr7B	349644983	349645637	654	13.4112	5.2e-41	2.98e-37	Up	Pericentromere	Expansion
	Chr7B	351090280	351090620	340	3.70875	0.000208284	0.00285661	Up	Pericentromere	Expansion
	Chr7B	354082912	354083313	401	3.68439	0.000229251	0.00308354	Up	Pericentromere	Expansion
	Chr7B	355758332	355759012	680	6.34352	2.25e-10	2.49e-08	Up	Pericentromere	Expansion
	Chr7B	357889768	357890647	879	4.92431	8.47e-07	2.79e-05	Up	Pericentromere	Expansion
	Chr7B	360981714	360982417	703	9.45584	3.2e-21	2.97e-18	Up	Pericentromere	Expansion
	Chr7B	360983718	360984170	452	3.49998	0.000465301	0.00551423	Up	Pericentromere	Expansion
	Chr7B	366969729	366970339	610	3.7666	0.000165486	0.0023662	Up	Pericentromere	Expansion
	Chr7B	341557157	341557998	841	10.1311	4.02e-24	5.8e-21	Up	Pericentromere	Expansion
Dt7BS	Chr7B	278979854	278980523	669	5.74422	9.23e-09	1.04e-06	Up	Pericentromere	Maintenance
	Chr7B	280048628	280049410	782	-4.13409	3.56e-05	0.000843494	Down	Pericentromere	Maintenance
	Chr7B	284129557	284129970	413	3.75597	0.000172669	0.00301919	Up	Pericentromere	Maintenance
	Chr7B	284754581	284754965	384	4.61217	3.98e-06	0.000143664	Up	Pericentromere	Maintenance
	Chr7B	285332190	285332394	204	4.49106	7.09e-06	0.00022962	Up	Pericentromere	Maintenance
	Chr7B	293846417	293846790	373	4.05958	4.92e-05	0.0010957	Up	Pericentromere	Maintenance
	Chr7B	300321536	300322056	520	3.51427	0.000440961	0.00637412	Up	Pericentromere	Maintenance
	Chr7B	300845758	300846419	661	4.01693	5.9e-05	0.00126633	Up	Pericentromere	Maintenance
	Chr7B	304142807	304143862	1055	4.6186	3.86e-06	0.00014005	Up	Pericentromere	Maintenance
	Chr7B	305980184	305981088	904	8.09268	5.84e-16	6.5e-13	Up	Pericentromere	Maintenance
	Chr7B	307087143	307088023	880	5.43062	5.62e-08	4.42e-06	Up	Pericentromere	Maintenance
	Chr7B	309288133	309288890	757	5.46071	4.74e-08	3.86e-06	Up	Pericentromere	Maintenance
	Chr7B	309289032	309289462	430	3.78648	0.000152799	0.00273394	Up	Pericentromere	Maintenance
	Chr7B	312720255	312720915	660	3.82814	0.000129115	0.00239127	Up	Pericentromere	Maintenance
	Chr7B	313150285	313150856	571	4.78171	1.74e-06	7.27e-05	Up	Pericentromere	Maintenance
	Chr7B	313161505	313161905	400	3.80596	0.000141255	0.00256808	Up	Pericentromere	Maintenance
	Chr7B	313164491	313164697	206	3.45913	0.000541924	0.00749653	Up	Pericentromere	Maintenance
Dt7DL	Chr7D	351527438	351527913	475	4.11515	3.87e-05	0.000506556	Up	Centromere	Maintenance
	Chr7D	351530367	351530880	513	5.24116	1.6e-07	4.92e-06	Up	Centromere	Maintenance
	Chr7D	353618272	353619758	1486	-9.57018	1.07e-21	1.03e-18	Down	Pericentromere	Maintenance
	Chr7D	354031339	354031924	585	7.80568	5.92e-15	1.53e-12	Up	Pericentromere	Maintenance
	Chr7D	359404152	359405263	1111	4.78722	1.69e-06	3.67e-05	Up	Pericentromere	Maintenance
	Chr7D	361431050	361432307	1257	-3.60441	0.000312866	0.00288126	Down	Pericentromere	Maintenance
	Chr7D	361619963	361620273	310	3.2531	0.00114154	0.00826214	Up	Pericentromere	Maintenance
	Chr7D	363128677	363129150	473	5.74563	9.16e-09	4.3e-07	Up	Pericentromere	Maintenance
	Chr7D	363372042	363372731	689	5.91647	3.29e-09	1.78e-07	Up	Pericentromere	Maintenance
	Chr7D	363562409	363563060	651	-3.62744	0.000286246	0.00267737	Down	Pericentromere	Maintenance
	Chr7D	371743876	371744488	612	4.22807	2.36e-05	0.000335042	Up	Pericentromere	Maintenance
	Chr7D	375507204	375507580	376	4.02077	5.8e-05	0.000710599	Up	Pericentromere	Maintenance
	Chr7D	376789055	376789444	389	-3.75973	0.000170095	0.00173806	Down	Pericentromere	Maintenance
	Chr7D	377315150	377316447	1297	6.10574	1.02e-09	6.48e-08	Up	Pericentromere	Maintenance
	Chr7D	377361894	377362306	412	6.3724	1.86e-10	1.5e-08	Up	Pericentromere	Maintenance
	Chr7D	377834754	377835355	601	4.30208	1.69e-05	0.000254463	Up	Pericentromere	Maintenance
	Chr7D	377999599	377999973	374	4.20937	2.56e-05	0.000359357	Up	Pericentromere	Maintenance
	Chr7D	378046812	378047356	544	5.0841	3.69e-07	1.01e-05	Up	Pericentromere	Maintenance
	Chr7D	379686770	379687515	745	-3.80524	0.000141665	0.00149562	Down	Pericentromere	Maintenance
	Chr7D	379693757	379694065	308	-3.68793	0.000226089	0.00219988	Down	Pericentromere	Maintenance
	Chr7D	380188870	380189465	595	6.88752	5.68e-12	7e-10	Up	Pericentromere	Maintenance
	Chr7D	380498327	380499624	1297	-4.69604	2.65e-06	5.36e-05	Down	Pericentromere	Maintenance
	Chr7D	380541340	380541791	451	4.87674	1.08e-06	2.5e-05	Up	Pericentromere	Maintenance
	Chr7D	380640806	380641351	545	4.45697	8.31e-06	0.000140403	Up	Pericentromere	Maintenance
	Chr7D	381261359	381262413	1054	-7.02492	2.14e-12	2.96e-10	Down	Pericentromere	Maintenance
	Chr7D	381535228	381536450	1222	-4.92176	8.58e-07	2.06e-05	Down	Pericentromere	Maintenance
	Chr7D	381546975	381548277	1302	-4.27911	1.88e-05	0.000277423	Down	Pericentromere	Maintenance
	Chr7D	382145449	382146188	739	7.34725	2.02e-13	3.66e-11	Up	Pericentromere	Maintenance
	Chr7D	382242138	382242419	281	4.29867	1.72e-05	0.000257684	Up	Pericentromere	Maintenance
	Chr7D	382242896	382243727	831	5.87012	4.35e-09	2.28e-07	Up	Pericentromere	Maintenance
	Chr7D	382616100	382618059	1959	8.70884	3.07e-18	1.56e-15	Up	Pericentromere	Maintenance
	Chr7D	383135216	383135654	438	5.02307	5.09e-07	1.32e-05	Up	Pericentromere	Maintenance
	Chr7D	383911973	383912652	679	4.53529	5.75e-06	0.000102751	Up	Pericentromere	Maintenance
	Chr7D	384423629	384423990	361	5.4888	4.05e-08	1.54e-06	Up	Pericentromere	Maintenance
	Chr7D	386220682	386220993	311	4.33983	1.43e-05	0.000220604	Up	Pericentromere	Maintenance
	Chr7D	386758885	386759244	359	3.27636	0.00105153	0.00772717	Up	Pericentromere	Maintenance
	Chr7D	386849954	386850791	837	5.83818	5.28e-09	2.69e-07	Up	Pericentromere	Maintenance
	Chr7D	389010209	389010844	635	-6.1282	8.89e-10	5.75e-08	Down	Pericentromere	Maintenance
	Chr7D	390336979	390338444	1465	-3.64941	0.00026284	0.00249833	Down	Pericentromere	Maintenance
	Chr7D	390670887	390671792	905	4.70416	2.55e-06	5.19e-05	Up	Pericentromere	Maintenance
	Chr7D	390983545	390983953	408	5.64296	1.67e-08	7.25e-07	Up	Pericentromere	Maintenance
	Chr7D	391259829	391260227	398	4.74896	2.04e-06	4.31e-05	Up	Pericentromere	Maintenance
	Chr7D	391260696	391261493	797	4.37103	1.24e-05	0.000195521	Up	Pericentromere	Maintenance
	Chr7D	391562620	391563018	398	5.12682	2.95e-07	8.29e-06	Up	Pericentromere	Maintenance
	Chr7D	391565766	391566202	436	5.21168	1.87e-07	5.64e-06	Up	Pericentromere	Maintenance
	Chr7D	391611698	391612398	700	4.39935	1.09e-05	0.000175428	Up	Pericentromere	Maintenance
	Chr7D	393664680	393665959	1279	9.86688	5.79e-23	7.51e-20	Up	Pericentromere	Maintenance
	Chr7D	394078378	394078703	325	4.45666	8.32e-06	0.000140551	Up	Pericentromere	Maintenance
	Chr7D	396798469	396798901	432	4.975	6.52e-07	1.63e-05	Up	Pericentromere	Maintenance
	Chr7D	396829779	396830189	410	4.30133	1.7e-05	0.00025517	Up	Pericentromere	Maintenance
	Chr7D	396916872	396917241	369	4.38417	1.16e-05	0.000185922	Up	Pericentromere	Maintenance
	Chr7D	397742921	397743313	392	5.76457	8.19e-09	3.9e-07	Up	Pericentromere	Maintenance
	Chr7D	397981618	397981939	321	9.08904	9.99e-20	6.75e-17	Up	Pericentromere	Maintenance
	Chr7D	397985941	397986465	524	8.06421	7.37e-16	2.28e-13	Up	Pericentromere	Maintenance
	Chr7D	397992046	397992393	347	3.80923	0.000139401	0.00147628	Up	Pericentromere	Maintenance
	Chr7D	398038093	398038758	665	4.41269	1.02e-05	0.000166765	Up	Pericentromere	Maintenance
	Chr7D	398307734	398308029	295	3.3929	0.000691567	0.00550267	Up	Pericentromere	Maintenance
	Chr7D	399308630	399309861	1231	8.32954	8.12e-17	2.99e-14	Up	Pericentromere	Maintenance
	Chr7D	399414569	399415590	1021	-5.55529	2.77e-08	1.11e-06	Down	Pericentromere	Maintenance
	Chr7D	401679460	401680036	576	3.51755	0.000435556	0.00377749	Up	Pericentromere	Maintenance
	Chr7D	402071505	402073018	1513	-6.17151	6.76e-10	4.52e-08	Down	Pericentromere	Maintenance
	Chr7D	371768956	371769454	498	3.34969	0.000809033	0.00624384	Up	Pericentromere	Maintenance
	Chr7D	386219993	386220284	291	3.20177	0.00136585	0.00956575	Up	Pericentromere	Maintenance
	Chr7D	397950875	397951502	627	4.12691	3.68e-05	0.000485971	Up	Pericentromere	Maintenance
Dt7DS	Chr7D	349706940	349707165	225	3.88602	0.0001019	0.00217208	Up	Centromere	Maintenance
	Chr7D	301462502	301462996	494	4.0173	5.89e-05	0.00140684	Up	Pericentromere	Maintenance
	Chr7D	310348863	310349603	740	3.39668	0.00068208	0.00979478	Up	Pericentromere	Maintenance
	Chr7D	322179224	322179810	586	4.08914	4.33e-05	0.00110614	Up	Pericentromere	Maintenance
	Chr7D	322828794	322830203	1409	4.42666	9.57e-06	0.000329767	Up	Pericentromere	Maintenance
	Chr7D	324421736	324422249	513	3.42974	0.000604152	0.00891823	Up	Pericentromere	Maintenance
	Chr7D	333731785	333732521	736	7.43313	1.06e-13	7.26e-11	Up	Pericentromere	Maintenance
	Chr7D	335885837	335886614	777	5.02219	5.11e-07	3.12e-05	Up	Pericentromere	Maintenance
	Chr7D	338772546	338772821	275	5.97252	2.34e-09	3.87e-07	Up	Pericentromere	Maintenance
	Chr7D	340428020	340428665	645	4.70477	2.54e-06	0.000113385	Up	Pericentromere	Maintenance
	Chr7D	344166643	344167455	812	-4.96425	6.9e-07	3.96e-05	Down	Pericentromere	Maintenance
	Chr7D	347476907	347477353	446	5.30887	1.1e-07	9.09e-06	Up	Pericentromere	Maintenance
	Chr7D	347507543	347507935	392	3.56966	0.000357446	0.00590981	Up	Pericentromere	Maintenance
	Chr7D	347511564	347512964	1400	5.36776	7.97e-08	6.93e-06	Up	Pericentromere	Maintenance
	Chr7D	317963813	317964291	478	6.32312	2.56e-10	5.96e-08	Up	Pericentromere	Maintenance
	Chr7D	338771849	338772229	380	3.67903	0.000234122	0.00424861	Up	Pericentromere	Maintenance
